# Supplementary material for: Thinning Levels of Laurel Natural Regeneration to Establish Traditional Agroforestry Systems, Ecuadorian Amazon Upper Basin
Source: MDPI journal article supplement (doi:10.3390/f14040667), 2023-03-23
Supplement: s1 [file s1]

**Table S1.** Variance analysis results (probability value, P) of the initial DBH ( $D_{2016}$ ) and the absolute (AGR) and relative growth rate (RGR) in DBH and basal area of laurel trees in plots subjected to different thinning levels, Sumaco Protected Forest.

| Variation Source         | $D_{2016}$ | AGR ( $\text{cm year}^{-1}$ ) |                              | RGR ( $\text{cm cm}^{-1} \text{ year}^{-1}$ ) |                              |
|--------------------------|------------|-------------------------------|------------------------------|-----------------------------------------------|------------------------------|
|                          |            | DBH (cm)                      | Basal area ( $\text{cm}^2$ ) | DBH (cm)                                      | Basal area ( $\text{cm}^2$ ) |
| Thinning level           | 0.0083     | <0.0001                       | <0.0001                      | 0.0005                                        | 0.0005                       |
| Between plots (thinning) | 0.2032     | 0.0414                        | 0.0331                       | 0.5673                                        | 0.5673                       |

**Table S2.** Parameters estimated and efficiency indicators for linear and quadratic regression models fitted for absolute growth in DBH and basal area (G) on number of trees per ha (N)

| Response variable | Parameters Estimated |           |                 | Fit and efficiency indicators |            |       |        |        |        |
|-------------------|----------------------|-----------|-----------------|-------------------------------|------------|-------|--------|--------|--------|
|                   | $b_0$                | $b_1$ (N) | $b_2$ ( $N^2$ ) | $R^2$                         | Adj- $R^2$ | C(p)  | AIC    | BIC    | SBS    |
| DBH               | 2.760                | -0.005    |                 | 0.663                         | 0.630      | 2.96  | -30.52 | -28.16 | -29.55 |
|                   | 4.778                | -0.020    | 0.000027        | 0.723                         | 0.662      | 3.00  | -30.88 | -27.10 | -29.42 |
| G                 | 92.603               | -0.197    |                 | 0.702                         | 1.870      | 52.95 | 52.95  | 55.72  | 53.92  |
|                   | 138.521              | -0.544    | 0.000618        | 0.699                         | 3.000      | 53.84 | 53.84  | 57.62  | 55.29  |

**Table S3.** Parameters estimated and efficiency indicators for linear and quadratic regression models fitted for relative growth in DBH (RGRD) and basal area (RGRG) on basal area per ha (G)

| Response variable | Parameters Estimated |           |                 | Fit and efficiency indicators |            |      |        |        |        |
|-------------------|----------------------|-----------|-----------------|-------------------------------|------------|------|--------|--------|--------|
|                   | $b_0$                | $b_1$ (N) | $b_2$ ( $N^2$ ) | $R^2$                         | Adj- $R^2$ | C(p) | AIC    | BIC    | SBS    |
| DBH               | 0.132                | -0.008    |                 | 0.496                         | 0.446      | 1.01 | -98.83 | -95.72 | -97.86 |
|                   | 0.140                | -0.010    | 0.00018         | 0.497                         | 0.385      | 3.00 | -96.84 | -93.06 | -95.39 |
| G                 | 0.265                | -0.016    |                 | 0.495                         | 0.444      | 1.01 | -82.17 | -79.06 | -81.20 |
|                   | 0.280                | -0.020    | 0.00035         | 0.496                         | 0.384      | 3.00 | -80.18 | -76.41 | -78.73 |
